# Supplementary material for: Detection and Analysis of Human Papillomavirus (HPV) DNA in Breast Cancer Patients by an Effective Method of HPV Capture
Source: PLoS One. 2014 Mar 10;9(3):e90343. doi: 10.1371/journal.pone.0090343 (PMC3948675; doi:10.1371/journal.pone.0090343)
Supplement: Table S1 — Summary of clinical data and sequencing analysis. (XLSX) [file pone.0090343.s001.xlsx]

## Sheet: Sheet1
Table S1. Summary of clinical data and sequencing analysis1
Patient ID	Gender	Age	Pathological type	ER3	PR4	HER-25 (FISH)	KI676	Molecular classification	Tissue type	Effective reads	Coverage	Average Depth	mapping ratio(HPV16)	number of SNVs on HPV16 genome
C0432	Female	85	Infiltrating duct carcinoma	1+	-	-	0.05	Luminal A	blood	337550	0	0	0	0
									tumor	6482384	0	0	0	0
									lymph	6688988	0	0	0	0
									normal	3850932	0	0	0	0
C045	Female	49	Infiltrating duct carcinoma	-	-	-	0.2	Basal-like	blood	597250	0	0	0	0
									tumor	2874818	0	0	0	0
									lymph	733820	0	0	0	0
									normal	1455032	0	0	0	0
C052	Female	40	Duct carcinoma in situ	2+	-	-	0.3	Luminal B	blood	7085444	0	0	0	0
									tumor	8528916	0	0	0	0
									lymph	15865604	0	0	0	0
									normal	11815590	0	0	0	0
C067	Female	37	Infiltrating duct carcinoma	3+	2+	-	0.3	Luminal B	blood	64690	0	0	0	0
									tumor	11711544	0	0	0	0
									lymph	17159092	0	0	0	0
									normal	10620412	0	0	0	0
C072	Female	48	Duct carcinoma in situ	3+	3+	-	0.05	Luminal A	blood	123534	0	0	0	0
									tumor	7183910	0	0	0	0
									lymph	1004034	0	0	0	0
									normal	3272344	0	0	0	0
C078	Female	46	Infiltrating duct carcinoma	-	-	+	0.1	Her(+)	blood	74418	0	0	0	0
									tumor	8846490	0	0	0	0
									lymph	16459326	0	0	0	0
									normal	10661734	0	0	0	0
C080	Female	56	Infiltrating duct carcinoma	3+	1+	+	0.25	Luminal B	blood	222842	0.7378	38	0.021199	24
									tumor	8925286	0.6354	14	0.00013916	9
									lymph	3484950	0.6964	6.3	0.00018594	9
									normal	4882848	0.6868	26	0.00061235	20
T007	-	-	-	-	-	-	-	-	blood	1571588	0	0	0	0
									tumor	295004	0.64	18.87	0.000669	15
									normal	685466	0.6	15.94	0.000832	15
T009	-	-	-	-	-	-	-	-	blood	2230418	0.62	4.02	0.00029171	9
									tumor	1515300	0.62	15	7.216e-05	13
									normal	1090122	0.58	14.12	9.6495e-05	12
Footnote: 1 The depth, mapping-ratio and coverage were only available for HPV16 in this table.
	2 The patient whose patient ID begins with letter of C is malignant breast cancer patient and whose patient ID begins with letter of T is benign breast tumour patient.
	3 Estrogen receptor
	4 Progestrone receptor
	5 Epidermal growth factor receptor
	6 A protein that in human is encoded by the MKI67 gene
